# Supplementary material for: High Prevalence of blaCTX-M-15 Gene among Extended-Spectrum β-Lactamase-Producing Escherichia coli Isolates Causing Extraintestinal Infections in Bangladesh
Source: Antibiotics (Basel). 2020 Nov 11;9(11):796. doi: 10.3390/antibiotics9110796 (PMC7696227; doi:10.3390/antibiotics9110796)
Supplement: Supplementary file 1 [file antibiotics-09-00796-s001.xlsx]

## Sheet: E.c Results
	Org.				Sequence types				Antibiotic Resistant Genes												ExPEC virulence factors							EAEC			ETEC		EIEC	EHEC	EPEC	Plasmid replicon typing		Pks island		Intergron class
Serial		Gender	Age (years)	Group	ST-69	ST-73	ST-95	ST-131	CTXM-15	CTXM gp1	CTXM gp2	CTXM gp9	TEM	OXA-1	NDM-1	IMP	VIM-1	KPC-2	OXA-48		afa	hylD	iutA	focG	kpsM II	papA	sfaS	aggR	CVD432	aspU	elt	est	ipaH	stx	eae	FIA	FIB	clbA	clbQ	intl1
1	E. coli	M	70	B2	-	-	-	p	p	p	-	-	-	p	-	-	-	-	-		-	-	p	-	p	p	-	-	-	-	-	-	-	-	-	p	p	-	-	2 kb
2	E. coli	F	84	B1	-	-	-	-	p	p	-	-	-	-	-	-	-	-	-		-	-	p	-	-	-	-	p	p	p	-	-	-	-	-	p	p	-	-	-
3	E. coli	F	57	B2	-	-	-	p	p	p	-	-	-	p	-	-	-	-	-		-	p	p	-	p	p	-	-	-	-	-	-	-	-	-	p	p	-	-	-
4	E. coli	M	46	B1	-	-	-	-	-	-	-	-	-	-	p	-	-	-	-		-	-	p	-	-	-	-	-	-	-	-	-	-	-	-	-	p	-	-	-
5	E. coli	F	4	B1	-	-	-	-	-	-	-	-	-	-	-	-	-	-	-		-	-	p	-	-	-	-	-	-	-	-	-	-	-	-	-	p	-	-	2 kb
6	E. coli	F	65	F	-	-	-	-	p	p	-	-	-	-	-	-	-	-	-		-	-	-	-	p	-	-	-	-	-	-	-	-	-	-	p	p	-	-	-
7	E. coli	M	34	B2	-	-	p	n	-	-	-	-	-	-	-	-	-	-	-		-	-	p	-	p	p	-	-	-	-	-	-	-	-	-	-	p	-	-	-
8	E. coli	M	76	C	-	-	-	-	p	p	-	-	-	p	-	-	-	-	-		-	-	p	-	-	-	-	-	-	-	-	-	-	-	-	p	p	-	-	-
9	E. coli	F	53	B2	-	-	-	p	-	-	-	-	-	-	-	-	-	-	-		-	-	p	-	p		-	-	-	-	p	p	-	-	-	p	p	-	-	-
10	E. coli	M	58	B2	-	-	-	p	p	p	-	-	-	p	-	-	-	-	-		-	p	p	-	p	p	-	-	-	-	-	-	-	-	-	p	p	-	-	2 kb
11	E. coli	M	64	UNKNOWN	-	-	-	-	p	p	-	-	-	-	-	-	-	-	-		-	-	-	-	-	-	-	-	-	-	-	-	-	-	-	-	-	-	-	-
12	E. coli	F	70	B1	-	-	-	-	-	-	-	-	-	-	-	-	-	-	-		-	-	-	-	-	-	-	-	-	-	p	-	-	-	-	-	p	-	-	-
13	E. coli	F	64	D	-	-	-	-	-	-	-	-	-	-	-	-	-	-	-		-	-	-	-	p		-	-	-	-	-	-	-	-	-	p	-	-	-	2 kb
14	E. coli	F	65	B2	-	-	p	n	-	-	-	-	-	-	-	-	-	-	-		-	-	p	-	p	p	-	-	-	-	-	-	-	-	-	p	-	-	-	-
15	E. coli	F	65	F	-	-	-	-	p	p	-	-	-	p	-	-	-	-	-		p	p	p	-	p	p	-	-	-	-	-	-	-	-	-	p	p	-	-	-
16	E. coli	F	67	B1	-	-	-	-	-	-	-	-	p	-	-	-	-	-	-		-	-	-	-	-	-	-	-	-	-	-	-	-	-	-	-	-	-	-	-
17	E. coli	F	1.6	C	-	-	-	-	-		-	-	-	-	-	-	-	-	-		p	-	p	-	-	-	-	-	-	-	-	-	-	-	-	-	-	-	-	-
18	E. coli	M	60	A	-	-	-	-	p	p	-	-	p	p	-	-	-	-	p		-	-	-	-	-	-	-	-	p	-	-	-	-	-	-	-	-	-	-	-
19	E. coli	M	55	C	-	-	-	-	p	p	-	-	-	-	-	-	-	-	-		-	-	p	-	-	-	-	-	-	-	-	-	-	-	-	-	-	-	-	-
20	E. coli	F	68	C	-	-	-	-	p	p	-	-	p	-	p	-	-	-	-		-	-	p	-	-	-	-	-	-	-	-	-	-	-	-	-	-	-	-	-
21	E. coli	M	0.3	A	-	-	-	-	p	p	-	-	-	-	-	-	-	-	-		-	-	p	-	-	-	-	-	-	-	-	-	-	-	-	p	-	-	-	-
22	E. coli	F	60	A	-	-	-	-	p	p	-	-	-	-	-	-	-	-	-		-	-	-	-	-	-	-	-	-	-	-	-	-	-	-	-	-	-	-	-
23	E. coli	F	47	A	-	-	-	-	p	p	-	-	-	-	-	-	-	-	-		-	-	-	-	-	-	-	-	-	-	-	-	-	-	-	-	-	-	-	-
24	E. coli	F	0.6	D	p	-	-	-	-	-	-	-	p	-	-	-	-	-	-		-	p	-	-	-	p	-	-	-	-	-	-	-	-	-	-	-	-	-	-
25	E. coli	F	50	B2	-	-	-	p	p	p	-	-	-	-	-	-	-	-	-		-	-	p	-	p	-	-	-	-	-	-	-	-	-	-	p	p	-	-	2 kb
26	E. coli	M	57	B2	-	-	-	p	-		-	-	-	-	-	-	-	-	-		-	-	p	-	p	p	-	-	-	-	-	-	-	-	-	p	p	-	-	2 kb
27	E. coli	F	38	B2	-	-	-	p	p	p	-	-	-	p	-	-	-	-	-		-	-	p	-	p	p	-	-	-	-	-	-	-	-	-	p	-	-	-	2 kb
28	E. coli	F	1	A	-	-	-	-	-	-	-	-	-	-	-	-	-	-	-		-	-	-	-	-	-	-	-	-	-	p	-	-	-	-	-	-	-	-	-
29	E. coli	F	5	B2	-	-	-	p	p	p	-	-	-	-	-	-	-	-	-		-	-	p	-	-	-	-	-	-	-	-	-	-	-	-	-	-	-	-	-
30	E. coli	M	60	B2	-	-	p	n	-	-	-	-	-	-	-	-	-	-	-		-	-	p	-	-	-	-	-	-	-	-	-	-	-	-	-	-	-	-	-
31	E. coli	M	65	B1	-	-	-	-	p	p	-	-	p	-	-	-	-	-	-		p	p	p	-	-	-	-	-	-	-	-	-	-	-	-	-	-	-	-	-
32	E. coli	F	65	D	-	-	-	-	-	-	-	-	-	-	-	-	-	-	-		-	-	p	-	p	-	-	-	-	-	-	-	-	-	-	p	-	-	-	-
33	E. coli	F	6	B1	-	-	-	-	-	-	-	p	-	-	-	-	-	-	-		-	-	p	-	-	-	-	-	-	-	-	-	-	-	-	-	p	-	-	-
34	E. coli	F	72	B2	-	-	-	p	p	p	-		-	p	-	-	-	-	-		-	-	p	-	p	p	-	-	-	-	-	-	-	-	-	p	p	-	-	-
35	E. coli	F	65	F	-	-	-	-	p	p	-	-	p	-	p	-	-	-	-		-	p	-	-	p	-	-	-	-	-	p	-	-	-	-	p	-	-	-	2 kb
36	E. coli	F	52	B2	-	-	-	p	p	p	-	-	-	p	-	-	-	-	-		-	-	p	-	p	p	-	-	-	-	-	-	-	-	-	p	p	-	-	-
37	E. coli	F	9	F	-	-	-	-	-	-	-	-	-	-	-	-	-	-	-		-	p	-	-	p	-	-	-	-	-	p	-	-	-	-	p	-	-	-	2 kb
38	E. coli	F	39	B1	-	-	-	-	-	-	-	-	-	-	-	-	-	-	-		-	-	-	-	-	-	-	-	-	-	p	-	-	-	-	-	-	-	-	-
39	E. coli	F	62	B2	-	-	-	n	p	p	-	-	-	-	-	-	-	-	-		p	-	-	-	p	p	-	-	-	-	-	-	-	-	-	-	p	-	-	-
40	E. coli	F	11	B2	-	-	-	p	-	-	-	p	-	-	-	-	-	-	-		-	-	p	-	p	-	-	-	-	-	p	-	-	-	-	p	p	-	-	-
41	E. coli	F	50	B2				-	p	p	-	-	-	-	-	-	-	-	-		-	p	p	-	p	-	-	-	-	-	-	-	-	-	-	p	p	p	p	-
42	E. coli	F	58	B2	-	-	-	n	-	-	-	-	-	-	-	-	-	-	-		-	-	-	-	-	-	-	-	-	-	-	-	-	-	-	-	-	-	-	-
43	E. coli	F	2.4	B2	-	-	-	p	p	p	-	-	-	-	-	-	-	-	-		p	-	p	-	p	-	-	-	-	-	-	-	-	-	-	-	p	-	-	2 kb
44	E. coli	F	58	D	-	-	-	-	p	p	-	-	p	p	p	-	-	-	-		-	-	-	-	p	-	-	-	-	-	-	-	-	-	-	p	p	-	-	-
45	E. coli	M	80	B2	-	-	p	n	-	-	-	-	-	-	-	-	-	-	-		-	p	p	-	p	-	-	-	-	-	-	-	-	-	-	p	p	p	p	-
46	E. coli	F	50	B1	-	-	-	-	-		-	-	p	-	-	-	-	-	-		-	-	-	-	-	-	-	-	-	-	-	-	-	-	-	p	p	-	-	-
47	E. coli	F	32	C	-	-	-	-	p	p	-	-	p	-	-	-	-	-	-		-	-	p	-	-	-	-	-	-	-	p	-	-	-	-	p	p	-	-	-
48	E. coli	F	27	B2	-	-	p	n	-	-	-	-	p	-	-	-	-	-	-		-	p	p	-	p	p	-	-	-	-	-	-	-	-	-	p	p	p	p	-
49	E. coli	M	30	F	-	-	-	-	-	-	-	-	-	-	-	-	-	-	-		-	-	-	-	p	-	-	-	-	-	-	-	-	-	-	p	p	-	-	-
50	E. coli	F	65	B2	-	-	-	p	p	p	-	-	-	-	-	-	-	-	-		-	-	p	-	p	p	-	-	-	-	-	-	-	-	-	p	p	-	-	-
51	E. coli	F	31	C	-	-	-	-	-		-	-	p	-	-	-	-	-	-		-	-	-	-	-	-	-	-	-	-	-	-	-	-	-	-	p	-	-	-
52	E. coli	F	40	B2	-	p	-	n	-	-	-	-	-	-	-	-	-	-	-		-	p	p	p	-	p	-	-	-	-	-	-	-	-	-	-	-	-	-	-
53	E. coli	F	12	B1	-	-	-	-	p	p	-	-	-	-	-	-	-	-	-		-	-	-	-	p	p	p	-	-	-	-	-	-	-	-	p	-	-	-	-
54	E. coli	M	69	B2	-	-	p	n	-		-	-	-	-	-	-	-	-	-		-	p	p	-	p	-	-	-	-	-	-	-	-	-	-	p	p	p	p	-
55	E. coli	F	50	B2	-	-	-	n	-	-	-	-	-	-	-	-	-	-	-		-	-	p	-	-	p	-	-	-	-	-	-	-	-	-	p	p	-	-	-
56	E. coli	M	55	E	-	-	-	-	p	p	-	-	-	p	p	-	-	-	-		-	-	p	-	-	-	-	-	-	-	-	-	-	-	-	p	p	-	-	-
57	E. coli	F	53	C	-	-	-	-	p	p	-	-	-	-	-	-	-	-	-		-	-	-	-	-	-	-	-	-	-	-	-	-	-	-	p	-	-	-	-
58	E. coli	F	66	B1	-	-	-	-	-	-	-	-	-	-	-	-	-	-	-		-	-	-	-	-	-	-	-	-	-	-	-	-	-	-	p	-	-	-	-
59	E. coli	F	50	D	-	-	-	-	p	p	-	-	p	-	-	-	-	-	-		-	-	p	-	p	-	-	-	-	-	-	-	-	-	-	-	-	-	-	-
60	E. coli	F	47	D	-	-	-	-	-	-	-	-	-	-	-	-	-	-	-		-	-	-	-	p	-	-	-	-	-	-	-	-	-	-	-	-	-	-	900 bp
61	E. coli	F	1.2	B2	-	-	-	n	p	p	-	-	-	-	-	-	-	-	-		-	-	p	-	p	-	-	-	-	-	-	-	-	-	-	p	p	-	-	-
62	E. coli	M	80	D	-	-	-	-	-	-	-	p	-	-	-	-	-	-	-		-	-	-	-	p	-	-	-	-	-	-	-	-	-	-	p	p	-	-	2 kb
63	E. coli	M	73	B2	-	-	-	p	p	p	-	-	-	-	-	-	-	-	-		-	p	p	-	p	p	-	-	-	-	-	-	-	-	-	-	-	-	-	-
64	E. coli	F	40	C	-	-	-	-	p	p	-	-	-	-	-	-	-	-	-		-	-	-	-	-	-	-	-	-	-	p	-	-	-	-	p	-	-	-	-
65	E. coli	F	32	B2	-	-	-	n	-	-	-	-	-	-	-	-	-	-	-		-	p	-	-	p	p	-	-	-	-	-	-	-	-	-	-	-	p	p	-
66	E. coli	F	39	B1	-	-	-	-	-	-	-	-	p	-	-	-	-	-	-		-	-	-	-	-	-	-	-	-	-	-	-	-	-	-	-	-	-	-	-
67	E. coli	M	35	B2	-	-	-	n	-	-	-	-	-	-	-	-	-	-	-		-	-	p	-	p	p	-	-	-	-	-	-	-	-	-	-	p	-	-	-
68	E. coli	M	63	B2	-	-	-	p	-	-	-	-	-	p	-	-	-	-	-		-	p	p	-	p	p	-	-	-	-	-	-	-	-	-	p	-	-	-	-
69	E. coli	F	0.6	B1	-	-	-	-	-	-	-	-	p	-	-	-	-	-	-		-	-	p	-	-	-	-	-	-	-	-	-	-	-	-	-	p	-	-	-
70	E. coli	M	13	B1	-	-	-	-	p	p	-	-	-	-	-	-	-	-	-		-	-	-	-	-	-	-	-	p	p	-	-	-	-	-	-	p	-	-	900 bp
71	E. coli	M	65	B2	-	-	-	p	p	p	-	-	-	-	-	-	-	-	-		-	-	p	-	p	-	-	-	-	-	-	-	-	-	-	p	-	-	-	-
72	E. coli	M	1.3	B2	-	-	-	p	p	p	-	-	p	p	-	-	-	-	-		-	-	p	-	p	p	-	-	-	-	-	-	-	-	-	p	p	-	-	-
73	E. coli	F	61	B2	-	-	-	p	p	p	-	-	-	-	-	-	-	-	-		-	-	p	-	p	-	-	-	-	-	-	-	-	-	-	p	p	-	-	-
74	E. coli	F	65	B2	-	-	-	p	p	p	-	-	-	-	-	-	-	-	-		-	p	p	-	p	p	-	-	-	-	-	-	-	-	-	p	p	-	-	2 kb
75	E. coli	M	74	B1	-	-	-	-	p	p	-	-	-	-	-	-	-	-	p		-	-	-	-	-	-	-	-	-	-	-	-	-	-	-	p	-	-	-	2 kb
76	E. coli	M	45	B2	-	-	p	n	-	-	-	-	-	-	-	-	-	-	-		-	p	p	-	p	p	-	-	-	-	-	-	-	-	-	p	p	p	p	-
77	E. coli	F	82	B2	-	-	-	n	-	-	-	-	p	-	-	-	-	-	-		-	-	-	-	p	p	-	-	-	-	-	-	-	-	-	-	p	p	p	-
78	E. coli	F	58	B2	-	-	p	n	p	p	-	-	-	-	-	-	-	-	-		-	p	p	-	p	p	-	-	-	-	-	-	-	-	-	p	p	-	-	-
79	E. coli	M	1.1	F	-	-	-	-	p	p	-	-	-	-	-	-	-	-	-		-	-	p	-	p	-	-	-	-	-	-	-	-	-	-	p	p	-	-	-
80	E. coli	M	55	F	-	-	-	-	-	-	-	-	-	-	-	-	-	-	-		-	-	-	-	-	-	-	-	-	-	-	-	-	-	-	-	-	-	-	-
81	E. coli	F	52	F	-	-	-	-	-	-	p	-	-	-	-	-	-	-	-		-	-	-	-	-	-	-	-	-	-	-	-	-	-	-	-	-	-	-	-
82	E. coli	F	65	UNKNOWN	-	-	-	-	-	-	-	-	-	-	-	-	-	-	-		-	-	-	-	-	-	-	-	-	-	-	-	-	-	-	p	p	-	-	-
83	E. coli	F	70	B2	-	-	-	n	-	-	-	-	-	-	-	-	-	-	-		-	-	p	-	p	p	-	-	-	-	-	-	-	-	-	p	p	-	-	2 kb
84	E. coli	M	62	B2	-	-	-	p	p	p	-	-	-	p	-	-	-	-	-		-	p	p	-	p	p	-	-	-	-	-	-	-	-	-	p	p	-	-	-
85	E. coli	F	28	B2	-	-	-	n	-	-	-	-	-	-	-	-	-	-	-		-	p	p	-	p	p	-	-	-	-	-	-	-	-	-	-	p	-	-	900 bp
86	E. coli	F	61	B2	-	-	-	n	-	-	-	-	-	-	-	-	-	-	-		-	-	p	-	p	-	-	-	-	-	-	-	-	-	-	p	p	-	-	-
87	E. coli	M	2	B2	-	-	-	p	-	-	-	p	-	-	-	-	-	-	-		-	p	p	-	p	p	-	-	-	-	-	-	-	-	-	p	p	-	-	600 bp
88	E. coli	F	8	F	-	-	-	-	p	p	-	-	-	p	-	-	-	-	-		-	-	p	-	p	-	-	-	-	-	-	-	-	-	-	p	p	-	-	-
89	E. coli	M	2.6	D	-	-	-	-	p	p	-	-	-	p	-	-	-	-	-		-	-	p	-	-	-	-	-	-	-	-	-	-	-	-	p	p	-	-	2 kb
90	E. coli	M	75	B2	-	-	p	n	-	-	-	-	-	-	-	-	-	-	-		-	p	p	-	p	p	-	-	-	-	-	-	-	-	-	p	p	p	p	-
91	E. coli	M	2	B1	-	-	-	-	p	p	-	-	-	-	-	-	-	-	-		-	-	p	-	-	-	-	-	-	-	-	-	-	-	-	p	-	-	-	2 kb
92	E. coli	F	62	B2	-	-	-	n	-	-	-	-	-	-	-	-	-	-	-		-	-	p	-	p	-	-	-	-	-	-	-	-	-	-	p	p	-	-	-
93	E. coli	F	60	B2	-	-	-	p	-	-	-	-	-	-	-	-	-	-	-		-	-	p	-	p	p	-	-	-	-	-	-	-	-	-	p	p	-	-	-
94	E. coli	M	65	B2	-	-	-	n	-	-	-	-	p	-	-	-	-	-	-		-	-	-	-	p	-	p	-	-	-	-	-	-	-	-	-	-	-	-	-
95	E. coli	F	73	B1	-	-	-	-	-	-	-	-	-	-	-	-	-	-	-		-	-	-	-	-	-	-	-	-	-	-	-	-	-	-	-	p	-	-	2 kb
96	E. coli	F	55	B2	-	-	-	n	-		-	-	-	-	-	-	-	-	-		-	-	-	-	p	p	p	-	-	-	-	-	-	-	-	-	-	-	-	-
97	E. coli	F	65	B2	-	-	-	p	p	p	-	-	-	-	-	-	-	-	-		-	p	p	-	p	p	-	-	-	-	-	-	-	-	-	p	p	-	-	2 kb
98	E. coli	F	45	B2	-	-	-	p	p	p	-	-	-	-	-	-	-	-	-		-	p	p	-	p	p	-	-	-	-	-	-	-	-	-	p	p	-	-	-
99	E. coli	F	36	B1	-	-	-	-	-	-	-	-	-	-	-	-	-	-	-		-	-	-	-	-	-	-	-	-	-	-	-	-	-	-	-	-	-	-	-
100	E. coli	F	20	C	-	-	-	-	p	p	-	-	p	-	-	-	-	-	-		-	-	-	-	-	-	-	-	-	-	-	-	-	-	-	-	-	-	-	-
101	E. coli	F	52	B2	-	-	-	-	-	-	-	-	p	-	-	-	-	-	-		-	-	p	-	p	-	p	-	-	-	-	-	-	-	-	p	p	-	-	-
102	E. coli	F	65	B2	-	-	-	p	p	p	-	-	-	-	-	-	-	-	-		-	p	p	-	p	p	-	-	-	-	-	-	-	-	-	p	p	-	-	-
103	E. coli	F	53	B2	-	-	-	p	p	p	-	-	-	p	-	-	-	-	-		-	p	p	-	p	p	-	-	-	-	-	-	-	-	-	p	p	-	-	-
104	E. coli	M	45	UNKNOWN	-	-	-	-	p	p	-	-	p	p	-	-	-	-	-		-	-	-	-	-	-	-	-	-	-	-	-	-	-	-	-	-	-	-	1 kb
105	E. coli	M	56	B2	-	-	p	-	p	p	-	-	-	-	-	-	-	-	-		-	p	p	-	p	p	-	-	-	-	-	-	-	-	-	-	-	-	-	-
106	E. coli	M	60	UNKNOWN	-	-	-	-	p	p	-	-	p	p	-	-	-	-	-		-	-	-	-	-	-	-	-	-	-	-	p	-	-	-	-	-	-	-	200 bp
107	E. coli	F	55	D	-	-	-	-	p	p	-	-	-	-	p	-	-	-	-		-	-	p	-	-	p	-	-	-	-	p	-	-	-	-	p	p	-	-	-
108	E. coli	M	48	B2	-	-	p	-	-	-	-	-	-	-	-	-	-	-	-		-	-	p	-	p	p	-	-	-	-	-	-	-	-	-	p	-	-	-	-
109	E. coli	F	30	B2	-	p	-	-	-	-	-	-	-	-	-	-	-	-	-		-	p	p	p	p	p	-	-	-	-	-	-	-	-	-	-	-	p	p	-
110	E. coli	F	46	D	-	-	-	-	p	p	-	-	-	-	-	-	-	-	-		-	-	-	-	p	p	-	-	-	-	-	-	-	-	-	-	-	-	-	-
111	E. coli	F	7	D	p	-	-	-	-	-	-	-	-	-	-	-	-	-	-		-	-	p	-	p	p	-	-	-	-	-	-	-	-	-	p	p	-	-	-
112	E. coli	F	26	UNKNOWN	-	-	-	-	p	p	-	-	-	-	-	p	-	-	-		-	-	-	-	-	-	-	-	-	-	-	-	-	-	-	-	-	-	-	-
113	E. coli	M	35	B2	p	-	-	-	p	p	-	-	-	-	-	-	-	-	-		-	-	p	-	p	p	-	-	-	-	-	-	-	-	-	-	p	-	-	-
114	E. coli	F	35	B1	-	p	-	-	p	p	-	-	-	-	-	-	-	-	-		-	p	p	p	p	p	-	-	-	-	-	-	-	-	-	-	-	p	p	-
115	E. coli	F	48	UNKNOWN	-	-	-	-	p	p	-	-	-	-	-	-	-	-	-		p	-	p	-	p	-	-	-	-	-	-	-	-	-	-	p	p	-	-	-
116	E. coli	F	46	B2	-	-	-	p	p	p	-	-	p	-	-	-	-	-	-		-	p	p	-	p	p	-	-	-	-	-	-	-	-	-	p	p	-	-	-
117	E. coli	F	36	A	p	-	-	-	-	-	-	-	-	-	-	-	-	-	-		-	-	p	-	p	p	-	-	-	-	-	-	-	-	-	p	p	-	-	-
118	E. coli	M	62	B2	?	-	-	-	p	p	-	-	-	p	-	-	-	-	-		-	-	p	-	p	p	-	-	-	-	-	-	-	-	-	-	-	-	-	-
119	E. coli	F	58	B2	p	-	-	p	p	p	-	-	-	p	-	-	-	-	-		p	-	p	-	p	-	-	-	-	-	-	-	-	-	-	p	-	-	-	-
120	E. coli	M	81	B2	-	-	-	-	-	-	-	-	-	-	-	-	-	-	-		-	-	-	-	p	-	-	-	-	-	-	-	-	-	-	-	-	-	-	-
121	E. coli	F	38	UNKNOWN	-	p	-	-	-	-	-	-	-	-	-	-	-	-	-		-	p	-	p	p	p	-	-	-	-	-	-	-	-	-	-	-	p	p	-
122	E. coli	F	18	E	-	-	-	-	p	p	-	-	p	-	-	-	-	-	-		-	-	-	-	-	-	-	-	-	-	-	-	-	-	-	-	p	-	-	-
123	E. coli	F	53	D	-	-	-	-	-	-	-	-	p	-	-	-	-	-	-		-	-	p	-	p	-	-	-	-	-	-	-	-	-	-	-	p	-	-	-
124	E. coli	F	60	D	-	-	-	-	p	p	-	-	p	p	-	-	-	-	-		-	-	p	-	-	p	-	-	-	-	-	-	-	-	-	p	p	-	-	800 bp
125	E. coli	F	65	F	-	-	-	-	-	-	-	-	-	-	-	-	-	-	-		-	-	-	-	-	-	-	-	-	-	-	-	-	-	-	-	-	-	-	-
126	E. coli	F	30	F	-	-	-	-	p	p	-	-	-	-	-	-	-	-	-		-	-	-	-	-	-	-	-	-	-	-	-	-	-	-	-	-	-	-	-
127	E. coli	F	63	B1	-	-	-	-	-	-	-	-	p	-	-	-	-	-	-		-	-	-	-	-	-	-	-	-	-	-	-	-	-	-	-	-	-	-	400 bp
128	E. coli	M	48	B1	-	-	-	-	-	-	-	-	-	-	-	-	-	-	-		-	-	-	-	-	-	-	-	-	-	-	-	-	-	-	-	-	-	-	400 bp
		1	P indicates positive
		2	dash indicates negative
